1        **Mmp10 is required for post-translational methylation of arginine at the active site of**  
2                                            **methyl-coenzyme M reductase**

3    Zhe Lyu<sup>1</sup>, Chau-wen Chou<sup>2</sup>, Hao Shi<sup>1</sup>, Ricky Patel<sup>1</sup>, Evert C. Duin<sup>3</sup>, and William B. Whitman<sup>1\*</sup>

4    <sup>1</sup> Department of Microbiology, and <sup>2</sup> Department of Chemistry, University of Georgia, Athens,  
5    GA 30602, USA; <sup>3</sup> Department of Chemistry and Biochemistry, Auburn University, Auburn, Al  
6    36849, USA

7    \*Corresponding author:

8        William B. Whitman

9        whitman@uga.edu

10       1-706-542-4219

11       FAX 1-706-542-2674

12

## 13 **Abstract**

14 Catalyzing the key step for anaerobic methane production and oxidation, methyl-coenzyme M  
15 reductase or Mcr plays a key role in the global methane cycle. The McrA subunit possesses up to  
16 five post-translational modifications (PTM) at its active site. Bioinformatic analyses had  
17 previously suggested that methanogenesis marker protein 10 (Mmp10) could play an important  
18 role in methanogenesis. To examine its role, MMP1554, the gene encoding Mmp10 in  
19 *Methanococcus maripaludis*, was deleted with a new genetic tool, resulting in the specific loss of  
20 the 5-(S)-methylarginine PTM of residue 275 in the McrA subunit and a 40~60 % reduction in  
21 the maximal rates of methane formation by whole cells. Methylation was restored by  
22 complementations with the wild-type gene. However, the rates of methane formation of the  
23 complemented strains were not always restored to the wild type level. This study demonstrates the  
24 importance of Mmp10 and the methyl-Arg PTM on Mcr activity.

## 25 **Introduction**

26 Methyl-coenzyme M reductase or Mcr catalyzes the last step of methane formation in all  
27 methanogenic Archaea and the first step of anaerobic methane oxidation in the methanotrophic  
28 Archaea or ANME (1, 2). It catalyzes the reversible reaction shown below that results in  
29 production of 500-600 Tg of CH<sub>4</sub> and oxidation of 70-300 Tg of CH<sub>4</sub> per year (3).

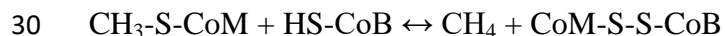

31 where CH<sub>3</sub>-S-CoM is methyl-coenzyme M and HS-CoB is coenzyme B. CH<sub>4</sub> is an important  
32 biofuel as well as a potential feedstock for the chemical industry if it could be converted by Mcr  
33 to a liquid biofuel with a high energy density (4, 5). CH<sub>4</sub> is also a potent greenhouse gas,  
34 increases of which are contributing to global warming (3). Therefore, understanding the

35 biochemistry of Mcr is significant not only to advance a CH<sub>4</sub>-based bioeconomy but also to  
36 develop environmental CH<sub>4</sub> mitigation strategies.

37         Although Mcr is notoriously difficult to study due to its extreme sensitivity to oxygen and  
38 lability of the active reduced form, structural and biochemical studies have uncovered many  
39 unique aspects (1, 6, 7). Using the *Methanothermobacter marburgensis* Mcr as a model, it has  
40 been shown that Mcr is a hexameric, 300 kD protein composed of three different subunits in an  
41  $\alpha_2\beta_2\gamma_2$  configuration (1). It contains two molecules of an unusual Ni tetrapyrrole, coenzyme F<sub>430</sub>  
42 or methylthio-F<sub>430</sub> in ANME-1, which is tightly but not covalently bound (1, 6). During  
43 enzymatic catalysis, the Ni(I) attacks the sulfur atom of methyl coenzyme M, producing a methyl  
44 radical intermediate, as proposed recently (7). The enzyme possesses two identical active sites,  
45 each of which contains up to five post-translationally modified amino acid residues(1). In *M.*  
46 *maripaludis* (Z. Lyu, CW. Chou, H. Shi, L. Wang, R. Ghebreab, D. Phillips, Y. Yan, E. C. Duin  
47 and W. B. Whitman, submitted for publication), the post-translational modifications (PTMs)  
48 include (*M. maripaludis* numbering) 1-*N*-methyl-His<sup>261</sup>, 5-(*S*)-methyl-Arg<sup>275</sup>, 2-(*S*)-methyl-  
49 Gln<sup>403</sup>, and thio-Gly<sup>448</sup>, which are all found within the McrA subunit (1). The *S*-methylation of  
50 cysteine, which is common in the Mcr of many methanogens (8), is in low abundance or absent  
51 in *M. maripaludis*. Generally, the PTMs are highly conserved among the Mcr from methanogens  
52 if not the ANME (8). For instance, the arginine methylation has been found in all methanogenic  
53 Mcr examined but not the ANME-1 Mcr.

54         Given the wide occurrence but limited diversity of these PTMs across the Mcr from  
55 distantly related species, they are believed to be important to catalysis. However, little is known  
56 about their biosynthesis or function. *S*-adenosyl methionine is believed to be the methyl donor  
57 for the methylations (9). Very recently, *tfuA* and *ycaO* (or methanogen marker protein 1)

58 homologs were found to be required for the thio-Gly PTM in *Methanosarcina acetivorans* (10).  
59 The present study identified a gene required for the 5-(S)-methyl-Arg PTM in *M. maripaludis*, a  
60 genetically tractable model organism for methanogenic Archaea (11).

## 61 **Results**

### 62 *Mmp10 is a candidate Arg methyltransferase for PTMs*

63 Methanogens encode a large number of hypothetical methyltransferases with unknown  
64 specificity, making it difficult to identify candidates for the PTMs of Mcr (9, 12). However,  
65 several criteria may help with identification of potential candidates. First, candidates for 5-(S)-  
66 methyl-Arg and N-methyl-His methyltransferase genes were hypothesized to be widely  
67 distributed among methanogens as these two modifications are conserved in all methanogens  
68 examined so far. Second, the methyltransferases were expected to be absent in most if not all  
69 non-methanogenic Archaea, which do not encode a Mcr. Third, the 5-(S)-methyl-Arg  
70 methyltransferase was expected to be absent in the ANME-1 methanotrophs, which lack this  
71 PTM. Fourth, this methyltransferase should possess a SAM-binding site, which is essential for  
72 SAM-dependent methylation of Mcr. Lastly, the methyltransferase gene might be located close  
73 to the *mcr* operon so that expression, modification and folding of Mcr would be better  
74 coordinated.

75 Classified into the TIGR03278 family by ProPhylo, the methanogenesis marker protein  
76 10 (Mmp10) seemed to meet all of the aforementioned criteria. It was found in many  
77 methanogens in a previous bioinformatic study and likely encodes a radical SAM enzyme, which  
78 has been long assumed to play an important role in methanogenesis (13). Located next to but  
79 transcribed divergently from the *mcr* operon (**Fig. 1A**), MMP1554 is the *mmp10* homolog in *M.*

80 *maripaludis* (14). Bioinformatic analysis here with a much larger dataset further confirmed that  
81 *mmp10* homologs were widely distributed in all methanogen lineages except *Methanoculleus*  
82 *bourgensis* and *Methanomassiliicoccales* spp. (**Table 1**). Homologs were also found in ANME-2  
83 methanotrophs and two unclassified euryarchaeotes but not in ANME-1 and any of the other  
84 archaeal species examined. These included the *Candidatus* ‘Bathyarchaeota’ and  
85 ‘Verstraetearchaeota’ genomes where other methanogenesis genes were recently found (15, 16).  
86 Among methanogens and methanotrophs that possess *mmp10* homologs, it was adjacent to the  
87 *mcr* operon except in the orders *Methanomicrobiales* and *Methanocellales*. Therefore, it was  
88 concluded that Mmp10 would be a reasonable candidate for a Mcr methyltransferase.

89         This conclusion was supported by an examination of the predicted domain and coenzyme  
90 binding sites for Mmp10 (**Fig. 1B**). Mmp10 has a SAM domain (pfam04055) of 190 amino acids  
91 on its N-terminus. Although its function is unknown, the similarly sized C-terminus is also  
92 highly conserved. This agrees with the structure of known methyltransferases, which typically  
93 consist of well-conserved SAM domains but different substrate-binding domains (17). This  
94 structural feature was conserved in nearly all Mmp10 homologs examined. A few exceptions  
95 came from draft genomes including *Methanobacterium formicicum* JCM 10132  
96 (Ga0128400\_10744), *Methanobrevibacter arboriphilus* JCM 13429 (Ga0128401\_11159),  
97 *Methanobrevibacter oralis* JMR01 (Ga0053424\_102302), *Methanogenium cariaci* JCM 10550  
98 (Ga0128318\_10529), *Methanosarcina barkeri* JCM 10043 (Ga0128387\_101358),  
99 *Methanosarcina mazei* JCM 9314 (Ga0128314\_100641) and an ANME-2  
100 (ANME2D\_draft\_0001.00000480). For these genes, either the N- or C-termini were truncated,  
101 possibly because the genomes were not complete. Indeed, closely related genomes of the same

102 genera or species all possessed the complete *mmp10*. The exception was *M. cariaci*, which was  
103 the only *Methanogenium* genome available in the IMG database.

104 Although SAM-dependent methyltransferases are very diverse, they generally share a  
105 highly conserved GxG motif that binds to the SAM nucleotide and an acidic residue located  
106 downstream that forms hydrogen bonds with the hydroxyl groups of the SAM ribose (18). The  
107 GxG motif is found at the end of one  $\beta$ -sheet, whereas the acidic residue is located in another  $\beta$ -  
108 sheet (18). Two candidates for this motif and downstream acidic residue were also present in the  
109 Mmp10 (**Fig. 1B** and **Fig. S1 in supplementary material**).

110 To gain insight into a possible recognition sequence for the methyltransferase, the R<sup>a275</sup>  
111 region of the methanogen and ANME genomes available in the IMG database were compared by  
112 Sequence Logo (**Fig. 1C**). Because the McrA subunit is highly conserved near the active site, the  
113 region near R<sup>275</sup> contained a large number of invariant residues. However, limiting a possible  
114 methylation consensus sequence to three residues on either side of the methylation site yielded a  
115 candidate motif of PxR<sup>274</sup>R<sup>275</sup>(A/S)R(G/A). Within this motif, the unmodified R<sup>274</sup> could interact  
116 with the coenzyme B at the active site due to their close interatomic distances, as revealed by a  
117 recent published methanococcal MCR crystal structure (**Fig. 2**) (19). While the methylated R<sup>275</sup>  
118 is located far away from coenzyme B, the methylation may provide structural benefits that could  
119 stabilize and/or enhance interactions between the R<sup>274</sup> and coenzyme B.

## 120 *A new tool for markerless deletion of mmp10*

121 A new plasmid vector p5L-R was constructed by assembling standardized genetic  
122 modules through BioBrick assembly (**Fig. S2**). The standard modules included a pUC57  
123 backbone, methanococcal promoter, selectable markers, methanococcal ribosomal binding sites

124 (RBS), and repetitive elements (RE), which were all BioBrick compatible. The pUC57 backbone  
125 harbored the origin of replication and *amp* for selection in *E. coli*. The positive and negative  
126 selectable markers in *Methanococcus* were *pac* and *hpt*, genes conferring puromycin resistance  
127 and 8-azahypoxanthine sensitivity, respectively (20, 21). They were synthesized to optimize  
128 codon usage for *pac*, remove extraneous bases, and eliminate internal BioBrick sites for *hpt*.  
129 PCR amplified from the pAW42 vector (22), the strong and constitutive promoter *PhmvA* drove  
130 expression of the selectable markers. To minimize homologous recombination between identical  
131 RBSs, different RBSs were introduced at the 5' ends of *pac* and *hpt* through PCR. They were the  
132 14 bp sequences immediately upstream of the *mcrB* and *hmvA* genes from *Methanococcus*  
133 *voltae*, respectively. In addition, a short sequence downstream of the *Methanococcus voltae mcr*  
134 operon which contained a terminator (Tmcr) was also introduced at the 3'-end of the *hpt-pac*  
135 cassette. The selectable markers were then flanked with two identical REs forming a RMR  
136 module, i.e., RE-Markers-RE, of which the REs can undergo homologous recombination to  
137 remove the markers and leave a short scar (**Fig. S3**). This marker removal strategy has been  
138 described recently, suggesting RE size affects homologous recombination efficiency (23). The  
139 p5L-R also included the upstream and downstream sequences of MMP0148, which were used to  
140 test its effectiveness for construction of the markerless deletion of MMP0148. Of the various RE  
141 sizes of 20, 40, 60, 120 and 180 bp examined, a minimal RE of 40 bp was needed for detectable  
142 marker removal. With a RE of 60 bp, marker deletion was always observed when making several  
143 mutants, including the  $\Delta mmp10$  deletion (see below) in *M. maripaludis*.

144 The full protocol, standardized primers and plasmid sequence for markerless deletions  
145 using p5L-R can be found in **Supplementary Methods**. Briefly, The RMR module of the p5L-R  
146 was PCR amplified with standardized primers with a different SfiI overhang at each end (**Table**

147 **S1**). Then 0.5~1 kb of upstream and downstream sequences of the target gene were PCR  
148 amplified with the same overhangs at the 3'-end of the upstream and 5'-end of the downstream  
149 sequence, respectively. The PCR products were digested with SfiI and ligated to create the initial  
150 construct, which was either used directly for transformation of *M. maripaludis* or PCR amplified  
151 to increase the amount of DNA. The p5L-R procedure (**Fig. S3**) addressed several shortcomings  
152 of previous markerless deletion tools in *M. maripaludis* (24). One, this strategy allowed for very  
153 reliable removal of the wild type genotype, while the previous tool yielded large numbers of wild  
154 type cells which had to be removed by screening (24). Two, the *M. maripaludis* genome does not  
155 contain any SfiI sites, so this strategy can be used for deletion of any gene. In contrast, the  
156 previous tools possessed multiple cloning sites that overlapped with restriction sites in the  
157 genome (24). Third, low concentrations of antibiotic (1 to 2.5  $\mu\text{g mL}^{-1}$  of puromycin) were  
158 effective for positive selection, while high concentrations of neomycin (500 to 1000  $\mu\text{g mL}^{-1}$ )  
159 were necessary with the previous tools (24). Lastly, the non-palindromic restriction enzyme SfiI  
160 minimized self-ligation, and cloning in *E. coli* was not required (25). Previously, two rounds of  
161 cloning were needed to make the final construct (24).

#### 162 *Mmp10* was necessary for arginine PTM

163 *M. maripaludis* mutants were constructed to investigate the role of Mmp10 in PTMs of  
164 Mcr. Strain S0030 possessed a  $\Delta mmp10$  deletion in the S0001 background. In strain S0031, the  
165  $\Delta mmp10$  mutation was complemented with the *mmp10* gene expressed under the control of *Pnat*,  
166 the predicted native promoter, from the plasmid pM10. In strain S0034, the deletion was  
167 complemented with *mmp10* expressed under the control of *PhmvA*, a constitutively strong  
168 promoter commonly used for *M. maripaludis* (26-28).



169 Mcr proteins were purified from the wild-type and mutant strains to determine the PTMs  
170 by LC MS/MS analysis. Three of the PTMs, 1-*N*-methyl-His<sup>261</sup>, 2-(*S*)-methyl-Gln<sup>403</sup>, and thio-  
171 Gly<sup>448</sup> of McrA, were found in the enzyme from the wild type and *Δmmp10* strains (data not  
172 shown). In partial trypsin digestions of the Mcr from wild-type S0001 cells, the 5-(*S*)-methyl-  
173 Arg modification was observed within an Arg-rich region of the protein in the peptide  
174 H\*ADVIQMGNALPGRr<sup>275</sup>, where H\* is the methyl-His<sup>261</sup> in a position homologous to that  
175 found in other methanogens and r<sup>275</sup> is the methyl-Arg. Because the methylation was on the  
176 second Arg in the peptide, it was only observed in partial trypsin digestions. In the McrA from  
177 S0001, the partially digested peptides containing methyl- r<sup>275</sup> represented only a small fraction of  
178 the peptides covering this region, about 3 % of the abundance of the fully digested peptide  
179 (**Table S2 and Fig. S4**). In contrast, the peptide containing the methyl-Arg PTM was not  
180 observed in the enzyme from the deletion strain S0030, even though the unmodified RR form of  
181 the partial digestion product increased to 8 % of the fully digested peptide (**Table S2 and Fig.**  
182 **S5**). Tryptic digestions tend to be incomplete at dibasic sites such as RR, RK and KK (29, 30).  
183 Thus, removal of the Arg modification was expected to increase the rate of partial cleavage as  
184 observed. In the Mcr from the complementation strain S0031, the unmodified peptide was not  
185 observed, and the fraction of partially digested peptide was reduced again to 4 %, as seen in the  
186 wild-type (**Table S2 and Fig. S6**).

187 While these results suggested that *mmp10* was required for the PTM of Arg<sup>275</sup>, the partial  
188 digestion by trypsin made quantification of the extent of modification difficult. For that reason, a  
189 pepsin degradation was developed that yielded the peptide PGRr<sup>275</sup>ARGPNEPGGIRF and  
190 enabled unambiguous quantification of the methyl-Arg<sup>275</sup>. Based on peak area integration, Me-  
191 Arg<sup>275</sup> was absent in the Mcr of the *Δmmp10* deletion strain (**Table 2 and Fig. S7**). In contrast,

192 more than 96-98% of the Arg<sup>275</sup> was methylated in the complementation and wild type strains  
193 (Table 2 and Fig. S8 to S10). These results confirmed that *mmp10* was required for the Arg<sup>275</sup>  
194 methylation.

195

#### 196 *Growth phenotype of $\Delta mmp10$ mutants*

197 The growth of the  $\Delta mmp10$  deletion strain S0030 was severely inhibited compared to the  
198 wild type. Not only did the lag phase increase, but the growth rate was reduced from  $0.27 \pm 0.03$   
199  $\text{h}^{-1}$  (average  $\pm$  standard deviation,  $n = 3$ ) in the wild-type to  $0.17 \pm 0.03 \text{ h}^{-1}$  in S0030 (Fig. 3).  
200 Complementation of the deletion failed to restore wild-type growth. Strain S0031 had a  
201 prolonged lag and its growth rate was further reduced to  $0.14 \pm 0.01 \text{ h}^{-1}$ . While strain S0034  
202 grew somewhat better than the deletion mutant, the lag was longer and the growth rate,  $0.19 \pm$   
203  $0.03 \text{ h}^{-1}$ , was still slower than wild type. To examine if the levels of Mcr expression were  
204 different among the strains, whole cell extracts were separated by SDS PAGE (Fig. 4). Although  
205 the McrA subunit was not well separated from other bands, the McrB and McrG subunits were  
206 readily identifiable, and the Mcr abundance for each strain could be calculated based on  
207 integration of the band intensity. Similar levels of Mcr were found in triplicates of all strains ( $p =$   
208  $0.13$  by One-way ANOVA), and they were  $13.6 \pm 1.8 \%$  (average and standard deviation of three  
209 measurements, S0001, the wild type),  $14.2 \pm 1.2 \%$  (S0030, the  $\Delta$  mutant),  $14.5 \pm 1.0 \%$  (S0034,  
210 the *PhmvA-mmp10* complement) and  $12.6 \pm 1.5 \%$  (S0031, the *Pnat.mmp10* complement). The  
211 similar SDS profiles among the strains also suggested similar expression levels for most other  
212 proteins (Fig. 4). Thus, the  $\Delta mmp10$  deletion and complementation did not appear to affect the  
213 levels of Mcr.

214           However, one band at the position of ~25 kDa showed substantial increase in intensity in  
215 strain S0031 ( $p < 0.0001$  by One-way ANOVA). The relative abundances were  $2.0 \pm 0.1$  %  
216 (average and standard deviation of three measurements, S0001),  $1.6 \pm 0.5$  % (S0030),  $2.8 \pm 0.2$   
217 % (S0034) and  $7.8 \pm 0.7$  % (S0031), respectively. MALDI sequencing analysis of the band from  
218 S0031 revealed that it was the puromycin N-acetyltransferase, which was encoded on the  
219 complementation plasmid and provided puromycin resistance.

220           The relative transcription rates of the *Pnat* and *PhmvA* promoters were also examined  
221 using an mCherry reporter system in strains S0032 and S0033, respectively. The mCherry  
222 fluorescence for S0032 was around 30-fold lower than S0033, i.e., arbitrary fluorescence values  
223  $\text{OD}^{-1} \text{ mL}^{-1}$  were  $19.3 \pm 1.5$  (average and standard deviation of three measurements) versus  $618 \pm$   
224  $40$ , respectively. Therefore, the differences in growth and methanogenesis observed between  
225 strains S0031 and S0034 could at least in part be attributed to the differences in expressional  
226 levels of *mmp10* between the two strains.

227           Collectively, these results suggested that the poor growth of the complementation strains  
228 was due to pleiotropic effects unrelated to the *mmp10* deletion. To test this hypothesis, the  
229 complementation plasmids were transformed into the wild type strain S0001, resulting in strains  
230 S0035 and S0036. Both strains grew poorly in comparison to the wild type and  $\Delta mmp10$  deletion  
231 strains (**Fig. 5A**). Moreover, the inhibition was even more profound than the corresponding  
232 complementation strains S0031 and S0034 in the  $\Delta mmp10$  background (**Fig. 5B**). Thus, the poor  
233 growth of the complementation strains appeared to be unrelated to their effect of Mcr  
234 methylation.

235 *Mcr activity in vivo*

236           The Mcr from *M. maripaludis* is very unstable even in cell extracts, and greater than 90  
237 % of the activity of resting cells is lost within one hour even under the conditions that stabilize  
238 the enzyme from *Methanothermobacter marburgensis* (unpublished observations). Therefore, the  
239 rates of methanogenesis of the  $\Delta mmp10$  mutant were compared to that of the wild-type in whole  
240 cells. Because the rates of methanogenesis by whole cells vary with the culture phase (31), the  
241 accumulation of methane in the culture headspace was followed throughout growth, and the rate  
242 of methanogenesis was calculated from the increases in methane in the culture headspace (**Fig.**  
243 **6A**). By this measure, the rates of methanogenesis by the  $\Delta mmp10$  strain S0030 never exceeded  
244 60% of the wild type rate. To confirm that these results were not due to fluctuations in the  
245 medium composition during growth, the rates of methanogenesis were also measured in resting  
246 cells after washing and resuspension in fresh medium (**Fig. 6B**), where a 60% reduction in the  
247 maximal rates of methanogenesis was observed in the  $\Delta mmp10$  strain S0030. These results  
248 confirmed that the rate of methanogenesis was severely impaired in the  $\Delta mmp10$  mutant.

249           In the complementation strains, the rate of methanogenesis was restored to the wild-type  
250 level in strain S0034, which possessed *mmp10* under the control of the strong *PhmvA* promoter,  
251 but the rate of methanogenesis for S0031, which possessed the *Pnat* promoter, was similar to that  
252 of the deletion mutant (**Fig. 6A and 6B**). In a separate experiment, the rates of methanogenesis  
253 for strains S0035 and S0036, which possessed the complementation plasmids in the wild-type  
254 background, were comparable to the wild-type level (data not shown).

255

## 256 **Discussion**

257 In this study, bioinformatic analyses identified the *M. maripaludis* MMP1554 gene  
258 encoding Mmp10 as a candidate methyltransferase for PTMs of the Mcr. To test this hypothesis,  
259 a  $\Delta mmp10$  mutant was constructed, and the methylation of Arg<sup>275</sup> in the active site region of Mcr  
260 was found to be lost. This PTM was restored when the mutant was complemented with *mmp10*  
261 expressed from plasmids, further supporting the bioinformatics prediction. However, even  
262 though Mmp10 contains structural features expected for a methyltransferase, these results do not  
263 eliminate the possibility that other proteins are required, and biochemical studies of Mmp10 will  
264 be required to confirm its activity. Because all other characterized arginine methylations take  
265 place at the guanidino nitrogen atoms instead of the C-5 (32), more information about the  
266 mechanism and role of Mmp10 is of great interest.

267 In resting cells, the rate of methanogenesis was reduced by 40-60 % in the  $\Delta mmp10$   
268 mutant, suggesting a role of the Arg methylation in modulating Mcr activity. These results are  
269 consistent with previous Tn-seq experiments which demonstrated that, although *mmp10* was not  
270 an essential gene, transposons insertions led to a decrease in fitness (33). Thus, it would not be  
271 surprising if the unmethylated Mcr retained only partial activity.

272 Two contrasting models can be envisioned for the loss in activity in the absence of the  
273 Arg PTM. First, the Arg methylation could be an important structural feature of the active site  
274 and play an important role in catalysis. Presumably, loss of this methylation may disorientate its  
275 neighboring R<sup>274</sup> at the active site and disrupt the interactions between the R<sup>274</sup> and coenzyme B,  
276 which could have negative catalytic consequences (Fig. 2). Second, it could also play a role in  
277 Mcr assembly. In most methanogens, *mmp10* and *mcr* are divergently transcribed, suggesting  
278 that their expression is coordinated. Thus, during translation, protein folding may be coordinated  
279 with the PTMs, which may occur co-translationally as the nascent chain emerges from the

280 ribosome (34, 35). This model is consistent with the observations that all the PTMs are deeply  
281 embedded within the native enzyme and likely to occur before insertion of coenzyme F<sub>430</sub> and  
282 the complete folding of the enzyme (1, 9). Thus, the low rates of methanogenesis of the *mmp10*  
283 deletion mutant could be a consequence of Mcr misfolding rather than a direct effect on  
284 catalysis. Currently, it is not possible to distinguish between these possibilities in the absence of  
285 a reliable *in vitro* assay. Moreover, they are not necessarily mutually exclusive, and the Arg PTM  
286 may play multiple roles in Mcr activity.

287         In strains S0031 or S0034, complementation of the deletion with *Mmp10* expressed on a  
288 plasmid with either its native promoter (*Pnat*) or a strong constitutive promoter (*PhmvA*) failed  
289 to restore wild-type growth even though the Mcr was fully methylated. This growth inhibition  
290 was reproduced in strains S0035 and S0036, where the same expression plasmids were instead  
291 transformed into the wild-type background. Therefore, both expression plasmids were inhibitive  
292 of growth. Thus, these results suggest that the failure of complementation to fully restore the  
293 growth phenotype could have resulted from effects independent of the effect on Mcr activity.  
294 Both methanogenesis and growth were substantially reduced in strain S0031, where the mutation  
295 was complemented with *mmp10* under control of the weak *Pnat* promoter. *mmp10* and *mcr* are  
296 divergently transcribed, and the *Pnat* and *Pmcr* promoter regions overlap. Thus, it was possible  
297 that cloning *Pnat* might have inhibited Mcr expression. However, the levels of Mcr found in  
298 whole cells were similar in this complement, the wild type and other strains. Thus, the lower  
299 methanogenesis activity was not a result of a direct effect on Mcr expression. Alternatively,  
300 *Pmcr* is also used to drive expression of puromycin N-transacetylase in the *pac* cassette of the  
301 complementation plasmids, and strain S0031 contained three-fold higher levels of this protein

302 than S0034, which contained *PhmvA*. Thus, the poor growth and methanogenesis of strain S0031  
303 could have been a consequence of the high expression of puromycin N-acetyltransferase.

304         Although the rate of methanogenesis in the *PhmvA* complementation strain S0034 was  
305 similar to that of wild type, the growth was somewhat slower. Because Mmp10 is probably  
306 highly expressed in this strain, it is possible that other proteins might have been post-  
307 translationally modified. SAM-dependent protein methyltransferases are known to specifically  
308 recognize the amino acid sequences flanking the amino acid to be methylated (9, 36, 37). Thus,  
309 the *M. maripaludis* proteome was searched *in silico* for the potential methylation consensus  
310 sequence PxRR<sup>275</sup>(A/S)R(G/A). Although an identical match was not found, one partial hit of  
311 RRSRG was identified in MMP0140, which encodes a putative hydrogenase maturation factor.  
312 Importantly, hydrogenase is a key enzyme in methanogenesis, and this gene is likely essential for  
313 growth (33, 38, 39). Therefore, spurious methylation of MMP0140 might well inhibit growth,  
314 and further investigation will be needed to address this possibility.

315         In conclusion, this study identified a gene required for the Arg PTM of Mcr, and a similar  
316 strategy that combines bioinformatic and experimental approaches may be employed in future  
317 gene discovery for the remaining methanococcal PTMs. The reduction of methanogenesis of the  
318 *mmp10* deletion mutant suggest that this PTM influences catalysis. However, the complex  
319 phenotype of the complementation strains suggests that *mmp10* may play additional roles beyond  
320 affecting Mcr activity, either in Mcr assembly or the PTM of other genes. The absence of *mmp10*  
321 in certain methanogens, such as *Methanomassiliicoccales* and the *Candidatus* ‘Bathyarchaeota’  
322 and ‘Verstraetearchaeota’ phyla, also suggests that the PTMs of Mcr are more diverse than  
323 previously anticipated.

324

## 325 **Materials and Methods**

### 326 *Strains and culture conditions*

327 Strains used in this study are listed in **Table 3**. The complex formate broth and solid  
328 medium for cultivation and transformation of *M. maripaludis* have been described previously,  
329 except that cysteine hydrochloride was replaced with equal amount of coenzyme M and the  
330  $\text{Fe}(\text{NH}_4)_2(\text{SO}_4)_2$  stock was replaced by a more diluted  $\text{FeSO}_4$  stock to reduce the final iron  
331 concentration from 35.1  $\mu\text{M}$  to 10.9  $\mu\text{M}$  (11, 31, 33, 40). This avoided small amounts of  
332 precipitates that formed occasionally, possibly due to the formation of iron sulfide. Puromycin  
333 ( $2.5 \mu\text{g mL}^{-1}$ ) and 8-azahypoxanthine ( $0.25 \text{ mg mL}^{-1}$ ) were added from anaerobic, sterile stocks  
334 as needed. All *M. maripaludis* cultures were grown at 37 °C with 15 Psi of  $\text{N}_2/\text{CO}_2$  in the  
335 headspace. Growth curves were followed by measuring optical densities of 600 nm. The cell dry  
336 weight was calculated from the optical densities based on previously published calibration curves  
337 (31, 41).

### 338 *Plasmids and strains construction*

339 Plasmids and PCR primers are listed in **Table 3** and **Table S3**. Cloning was performed in  
340 *E. coli* Top10, and selection was conducted with  $100 \mu\text{g mL}^{-1}$  ampicillin. Genomic DNA  
341 extraction, DNA purification, and plasmid isolation were done with Zymo Research kits D6005,  
342 D4001/4003, and D4020, respectively, according to the manufacturer's instructions. All PCR  
343 reactions were performed with the Phusion® High-Fidelity DNA Polymerase (NEB, M0530S).

344 A linear DNA fragment Mm10 was constructed for performing markerless deletion of  
345 *mmp10* from the wild-type strain S0001, producing strain S0030. This strategy is described in  
346 detail in Supplementary Methods. Upon transformation, genomic integration of the Mm10



347 construct through homologous recombination was positively selected with puromycin. Colonies  
348 of the selected transformants were subjected to PCR amplification using primers 1554-F/R to  
349 confirm complete integration. Removal of the markers was achieved by selection with  
350 azahypoxanthine for a second homologous recombination between the two repetitive elements or  
351 RE. The identity of colonies of the  $\Delta mmp10$  mutant were confirmed by PCR amplification using  
352 primers 1554-F/R to confirm complete removal of the markers (**Fig S11A**). This conclusion was  
353 further confirmed by the sensitivity of the mutant to puromycin and the inability of primers  
354 1554w-F/R, which target an internal region of *mmp10*, to yield a product. As a positive control,  
355 PCR amplification under the same conditions detected 0.1% of wild-type DNA when mixed with  
356 the mutant DNA (**Fig S11B**).

357       Expression plasmid vectors pM10 and p4MK10 were made to complement the  $\Delta mmp10$   
358 in strain S0030, producing strains S0031 and S0034, respectively. The same two plasmids were  
359 also transformed into the wild-type strain S0001, resulting in strains S0035 and S0036,  
360 respectively. Expression of *mmp10* was under the control of the predicted native promoter *Pnat*  
361 in pM10. Expression of *mmp10* was under the control of the constitutive *PhmvA* promoter in  
362 p4MK10. The strength of *Pnat* and *PhmvA* promoters were quantified in strains S0032 and  
363 S0033, which harbored vectors pM10m and pMEV4m, respectively. The pMEV4m possessed  
364 the mCherry reporter under control of *PhmvA* and enabled gene expression to be quantified by  
365 following the mCherry fluorescence (Lyu and Whitman, unpublished observation). In pM10m,  
366 mCherry expression was controlled by *Pnat*. To make pM10m, two PCR products were made,  
367 digested with *EcoRI* and *NdeI*, and ligated by T4 DNA ligase (NEB, M0202S). The first PCR  
368 product was amplified from S0001 genomic DNA with primers 1554P-F/R, producing *Pnat*. The  
369 second PCR product was amplified from the pMEV4m plasmid with primers 4mp-F/R,

370 producing the vector backbone with the *PhmvA* removed. Similarly, another two PCR products  
371 were made, digested with *NdeI* and *PstI*, and ligated to make pM10. The first PCR product was  
372 amplified from S0001 genomic DNA with primers 1554c-Fa/R, producing the complete *mmp10*  
373 gene. The second PCR product was amplified from the pM10m plasmid DNA with primers  
374 p4Brk-F and 1554P-R, producing the native promoter and vector backbone with the mCherry  
375 gene removed. The p4MK10 was made by cloning *mmp10* into pMEV4 at the *SpeI* and *PstI*  
376 sites. Specifically, *mmp10* was amplified from S0001 genomic DNA with primers 1554c-Fb/R,  
377 and the product was digested with *XbaI* and *PstI* before ligation into the pMEV4 backbone. The  
378 pMEV4 backbone was amplified from the pMEV4 plasmid DNA with primers p4Brk-F/R.

379 Another expression vector pMcrS1 was constructed to express the wildtype *mcr* operon  
380 fused with a 6 $\times$ -histag under control of the *PhmvA* promoter in strain S0001, resulting in a new  
381 strain S0037. Details regarding this construction will be reported elsewhere.

### 382 *Fluorescence quantification*

383 Triplicate cultures were grown to an absorbance of 0.4~0.6 in the presence of puromycin.  
384 Cultures of 2 mL were harvested by centrifugation at 17, 000 g x 1 min, resuspended in 200  $\mu$ L  
385 of PIPES-K buffer (25 mM and pH 6.8), and frozen at -80  $^{\circ}$ C overnight. For activating the  
386 mCherry, cell extracts were thawed and incubated overnight in air with shaking at 30  $^{\circ}$ C in the  
387 dark. The cell extracts were cleared by centrifugation at 17, 000 g x 1 min before measuring the  
388 fluorescence of the supernatant using Qubit 2.0 with excitation at 600-645 nm and emission at  
389 665-725 nm.

### 390 *Purification of methyl-coenzyme M reductase*

391 Cultures were grown in 1.5 L of complex formate broth to an absorbance of about 0.8.  
392 Cells were freshly harvested aerobically by centrifugation at 17,700 x g for 15 min at room  
393 temperature. Cells were resuspended in about 2 mL of Mcr buffer  $g^{-1}$  wet weight and stored at -  
394 20 °C. The Mcr buffer contained 10 mM Ti(III) citrate, 10 mM coenzyme M, 0.1 mM  
395 methylviologen in 150 mM monosodium phosphate (pH 8.0) buffer. The cells in the Mcr buffer  
396 were thawed and remained on ice during sonication, which was conducted with a W-380  
397 sonicator (Heat Systems-Ultrasonics, Inc) for 20 cycles of 5 s bursts with the output set at 5 and  
398 duty cycle set at 90 %. The lysate was then centrifuged at 17,000 x g for 5 min to remove cell  
399 debris. To achieve 50 %  $(NH_4)_2SO_4$  saturation, an equal volume of a saturated  $(NH_4)_2SO_4$   
400 solution was added to the supernatant. After about 30 min, the precipitate was collected by  
401 centrifugation at 17,000 x g for 5 min and discarded. Additional  $(NH_4)_2SO_4$  powder was added to  
402 achieve 100 % saturation. After about 30 min, the precipitate was collected by centrifugation and  
403 resuspended in 4 mL of buffer A [1 mM coenzyme M in 10 mM Tris-HCl, pH 7.6]. The resulting  
404 proteins were desalted by concentration on an Amicon Ultra -4 centrifugal filter (Millipore, 10-  
405 kDa cutoff) by centrifugation at 7,500 x g for 15 min at 4 °C and resuspension in the same buffer.  
406 The desalted and concentrated proteins were resuspended with 2.5 mL buffer A and loaded onto  
407 a Q-sepharose XK16 anion-exchange column equilibrated with the same buffer. The protein was  
408 eluted using an Akta fast protein liquid chromatograph (FPLC) system (GE healthcare) with a  
409 linear gradient of 0 % to 100 % buffer B [buffer A plus 1 M NaCl]. A similar protocol was used  
410 for purification of the his-tagged recombinant Mcr, except that coenzyme M was removed from  
411 the buffers and the ammonium sulfate precipitation was replaced by a Ni-Sepharose column (GE  
412 Healthcare) step, where protein was eluted using a linear imidazole gradient from 0 % to 100 %  
413 before the ion-exchange chromatography with Q-Sepharose. The Mcr subunits were separated by

414 SDS PAGE and stained with AcquaStain (Bulldog Bio) for 2 to 10 min until protein bands  
415 appeared. The gel was then washed with ddH<sub>2</sub>O, and a slice of gel containing the McrA subunit  
416 was excised and destained twice with 30 % ethanol before being processed for mass  
417 spectrometry.

#### 418 *Mass spectrometry analysis*

419 For trypsin digestion, the gel bands were sliced into small pieces and rinsed twice with  
420 50% acetonitrile/20 mM ammonium bicarbonate (pH 7.5~8.0). Proteins in the gel pieces were  
421 then alkylated by 50 mM iodoacetamide in 20 mM ammonium bicarbonate for 1 hour in the  
422 dark. The gel pieces were rinsed twice with 50 % acetonitrile in 20 mM ammonium bicarbonate,  
423 dehydrated by adding 100% of acetonitrile and dried by a SpeedVac. Then small amounts of  
424 trypsin solution (Promega, 0.01 $\mu$ g  $\mu$ L<sup>-1</sup> in 20 mM ammonium bicarbonate) were added until the  
425 gel pieces totally absorbed the solution. The tubes were placed in an incubator at 37 °C  
426 overnight. The tryptic peptides were extracted twice from gel pieces with 50 % acetonitrile in 0.1  
427 % formic acid. The extracts were then combined and taken to dryness on a SpeedVac. A similar  
428 protocol was used for pepsin digestion, except that the pH was adjusted to ~2 with 0.04 M HCl  
429 and the digestion was performed for 48 h.

430 The mass spectrometry analyses were performed on a Thermo-Fisher LTQ Orbitrap Elite  
431 Mass Spectrometer coupled with a Proxeon Easy NanoLC system (Waltham, MA) located at the  
432 Proteomics and Mass Spectrometry Facility, University of Georgia. The peptides were loaded  
433 onto a reversed-phase column (Dionex PepMap 100 C8, or 100  $\mu$ m id column/emitter self-  
434 packed with 200 Å 5  $\mu$ M Bruker MagicAQ C18 resin) and then eluted into the mass  
435 spectrometer. Briefly, the two-buffer gradient elution at a flow rate of 500 nL min<sup>-1</sup> (0.1% formic  
436 acid as buffer A and 99.9 % acetonitrile with 0.1 % formic acid as buffer B) started with 5 % B

437 for 2 min, then increased to 25 % B in 60 min, to 40 % B in 10 min, and finally to 95% B in 10  
438 min.

439 The data-dependent acquisition (DDA) method was used to acquire MS data. A survey  
440 MS scan was acquired first, and then the top 5 ions in the MS scan were selected for CID and  
441 HCD MS/MS experiments. Whenever necessary, ETD was used instead of CID for better  
442 identification of post-translational modifications (42). MS and MS/MS scans were acquired by  
443 Orbitrap at the resolutions of 120,000 and 30,000, respectively. Data were acquired using  
444 Xcalibur software (version 2.2, Thermo Fisher Scientific). Protein identification and  
445 modification characterizations were performed using Thermo Proteome Discoverer (version  
446 1.3/1.4) with Mascot (Matrix Science) or SEQUEST (Thermo) programs.

#### 447 *Resting cell rates of methanogenesis*

448 To follow CH<sub>4</sub> production during growth, cultures were inoculated into 20 mL of formate  
449 medium without puromycin in 210 mL anaerobic bottles with fused-in side arms for convenient  
450 measurement of cell densities unless otherwise mentioned. The headspace was sampled for CH<sub>4</sub>  
451 throughout growth. For assays of resting cells, 4 mL of culture were harvested at different  
452 growth stages by centrifugation at 2800 x g for 10 min inside an anaerobic chamber. Triplicate  
453 cell pellets were washed and resuspended in 1.6 mL of formate medium in a 4.6 mL anaerobic  
454 vial sealed with a butyl rubber stopper. Vials were flushed immediately with an atmosphere of  
455 N<sub>2</sub>/CO<sub>2</sub> for 30 s, and the assay was initiated by incubating at 37 °C. Headspace gas was  
456 withdrawn from the vials at intervals of 3-6 min for 30-50 min, and methane was detected with  
457 an SRI 8610-C gas chromatograph as described previously (31). One unit was defined as 1 μmol  
458 of CH<sub>4</sub> produced per min.

459           During the growth experiment, CH<sub>4</sub> production rates in the culture were corrected for the  
460 removal of cells during sampling. Specific growth rates during exponential growth were  
461 analyzed by linear regression of the logarithm of the optical density with time. In parallel, cell  
462 extracts from the culture were separated in an SDS gel to examine protein expression profiles  
463 (43). The relative abundance for any proteins of interest in the SDS gel was also estimated by  
464 integrating peak area for that band and compared to the total peak areas for the entire lane using  
465 ImageJ (44). All samples were prepared in triplicate, and mean values of the triplicates ±  
466 standard deviation were presented.

#### 467 *Bioinformatic analyses*

468           Distribution of the methanogenesis marker 10 gene family TIGR03278 across Archaea  
469 was assessed using the Integrated Microbial Genomes & Microbiomes Expert Review or IMG/M  
470 ER platform (45, 46). Not hosted by the IMG/M ER, ANME-1 (FP565147) and  
471 Verstraetearchaeota (GCA\_001717005, GCA\_001717035, GCA\_001717015, GCA\_001717085  
472 and MAGU000000000) genome assemblies from Genbank were searched by BLAST for the  
473 marker 10 homologs from ANME-2 and *M. maripaludis*. Terminators were predicted by  
474 ARNold (47). Protein structural analysis was conducted with either EMBOSS 6.5.7 (48) or  
475 Protein Workshop (49). Unless otherwise mentioned, all other analyses were done with Geneious  
476 versions 8 and 10 (50).

477

#### 478 **Author Contributions**

479 The experiments were conceived and designed by LZ, CWC, ECD and WBW. They were  
480 executed by LZ, CWC, SH and RP. The manuscript was written by LZ, CWC and WBW.

## 481 **Acknowledgment**

482 We thank Aynom Tsegay Misghina and Bhavana Nagareddy for their assistance in developing  
483 the p5L-R tool, the University of Georgia iGEM team for their contribution in developing the  
484 methanococcal mCherry reporter system, Hannah Bullock for assistance using the FPLC, and  
485 the Whitman lab members, especially Suet Yee Chong and Nana Shao, for assistance with  
486 crystal structure analysis. In addition, partial support was provided by the Office of the Vice-  
487 President for Research at the University of Georgia, the Korea Institute of Ocean Science and  
488 Technology, National Science Foundation grant MCB-1410102, and a contract from the U.S.  
489 Department of Energy.

## 490 **References**

- 491 1. Ermler U, Grabarse W, Shima S, Goubeaud M, Thauer RK. 1997. Crystal structure of  
492 methyl-coenzyme M reductase: the key enzyme of biological methane formation. *Science*  
493 278:1457-62.
- 494 2. Scheller S, Goenrich M, Boecher R, Thauer RK, Jaun B. 2010. The key nickel enzyme of  
495 methanogenesis catalyses the anaerobic oxidation of methane. *Nature* 465:606-8.
- 496 3. Conrad R. 2009. The global methane cycle: recent advances in understanding the  
497 microbial processes involved. *Environ Microbiol Rep* 1:285-292.
- 498 4. Rittmann S, Seifert A, Herwig C. 2015. Essential prerequisites for successful bioprocess  
499 development of biological CH<sub>4</sub> production from CO<sub>2</sub> and H<sub>2</sub>. *Crit Rev Biotech* 35:141-  
500 51.
- 501 5. Soo VW, McAnulty MJ, Tripathi A, Zhu F, Zhang L, Hatzakis E, Smith PB, Agrawal S,  
502 Nazem-Bokae H, Gopalakrishnan S, Salis HM, Ferry JG, Maranas CD, Patterson AD,

- 503 Wood TK. 2016. Reversing methanogenesis to capture methane for liquid biofuel  
504 precursors. *Microb Cell Fact* 15:11.
- 505 6. Shima S, Krueger M, Weinert T, Demmer U, Kahnt J, Thauer RK, Ermler U. 2011.  
506 Structure of a methyl-coenzyme M reductase from Black Sea mats that oxidize methane  
507 anaerobically. *Nature* 481:98-101.
- 508 7. Wongnate T, Sliwa D, Ginovska B, Smith D, Wolf MW, Lehnert N, Raugei S, Ragsdale  
509 SW. 2016. The radical mechanism of biological methane synthesis by methyl-coenzyme  
510 M reductase. *Science* 352:953-8.
- 511 8. Kahnt J, Buchenau B, Mahlert F, Krüger M, Shima S, Thauer RK. 2007. Post-  
512 translational modifications in the active site region of methyl-coenzyme M reductase  
513 from methanogenic and methanotrophic archaea. *FEBS Journal* 274:4913-4921.
- 514 9. Selmer T, Kahnt J, Goubeaud M, Shima S, Grabarse W, Ermler U, Thauer RK. 2000. The  
515 biosynthesis of methylated amino acids in the active site region of methyl-coenzyme M  
516 reductase. *J Biol Chem* 275:3755-60.
- 517 10. Nayak DD, Mahanta N, Mitchell DA, Metcalf WW. 2017. Post-translational  
518 thioamidation of methyl-coenzyme M reductase, a key enzyme in methanogenic and  
519 methanotrophic Archaea. *Elife* 6.
- 520 11. Sarmiento F, Leigh JA, Whitman WB. 2011. Genetic systems for hydrogenotrophic  
521 methanogens. *Methods Enzymol* 494:43-73.
- 522 12. Niewmierzycka A, Clarke S. 1999. S-Adenosylmethionine-dependent Methylation in  
523 *Saccharomyces cerevisiae* : Identification of A Novel Protein Arginine  
524 Methyltransferase. *J Biol Chem* 274:814-824.



- 525 13. Basu MK, Selengut JD, Haft DH. 2011. ProPhylo: partial phylogenetic profiling to guide  
526 protein family construction and assignment of biological process. *BMC Bioinformatics*  
527 12:1-14.
- 528 14. Yoon SH, Turkarslan S, Reiss DJ, Pan M, Burn JA, Costa KC, Lie TJ, Slagel J, Moritz  
529 RL, Hackett M, Leigh JA, Baliga NS. 2013. A systems level predictive model for global  
530 gene regulation of methanogenesis in a hydrogenotrophic methanogen. *Genome Research*  
531 doi:10.1101/gr.153916.112.
- 532 15. Vanwonterghem I, Evans PN, Parks DH, Jensen PD, Woodcroft BJ, Hugenholtz P, Tyson  
533 GW. 2016. Methylophilic methanogenesis discovered in the archaeal phylum  
534 Verstraetearchaeota. *Nat Microbiol* 1:16170.
- 535 16. Evans PN, Parks DH, Chadwick GL, Robbins SJ, Orphan VJ, Golding SD, Tyson GW.  
536 2015. Methane metabolism in the archaeal phylum Bathyarchaeota revealed by genome-  
537 centric metagenomics. *Science* 350:434-8.
- 538 17. Kozbial PZ, Mushegian AR. 2005. Natural history of S-adenosylmethionine-binding  
539 proteins. *BMC Structural Biology* 5:19.
- 540 18. Struck AW, Thompson ML, Wong LS, Micklefield J. 2012. S-adenosyl-methionine-  
541 dependent methyltransferases: highly versatile enzymes in biocatalysis, biosynthesis and  
542 other biotechnological applications. *Chembiochem* 13:2642-55.
- 543 19. Wagner T, Wegner CE, Kahnt J, Ermler U, Shima S. 2017. Phylogenetic and structural  
544 comparisons of the three types of methyl-coenzyme M reductase from Methanococcales  
545 and Methanobacteriales. *J Bacteriol* doi:10.1128/JB.00197-17.

- 546 20. Gernhardt P, Possot O, Foglino M, Sibold L, Klein A. 1990. Construction of an  
547 integration vector for use in the archaeobacterium *Methanococcus voltae* and expression of  
548 a eubacterial resistance gene. *Molec Gen Genet* 221:273-279.
- 549 21. Bowen TL, Lin WC, Whitman WB. 1996. Characterization of guanine and hypoxanthine  
550 phosphoribosyltransferases in *Methanococcus voltae*. *J Bacteriol* 178:2521-6.
- 551 22. Walters AD, Smith SE, Chong JP. 2011. Shuttle vector system for *Methanococcus*  
552 *maripaludis* with improved transformation efficiency. *Appl Environ Microbiol* 77:2549-  
553 51.
- 554 23. Farkas J, Stirrett K, Lipscomb GL, Nixon W, Scott RA, Adams MW, Westpheling J.  
555 2012. Recombinogenic properties of *Pyrococcus furiosus* strain COM1 enable rapid  
556 selection of targeted mutants. *Appl Environ Microbiol* 78:4669-76.
- 557 24. Moore BC, Leigh JA. 2005. Markerless mutagenesis in *Methanococcus maripaludis*  
558 demonstrates roles for alanine dehydrogenase, alanine racemase, and alanine permease. *J*  
559 *Bacteriol* 187:972-9.
- 560 25. Wentzell LM, Nobbs TJ, Halford SE. 1995. The *SfiI* restriction endonuclease makes a  
561 four-strand DNA break at two copies of its recognition sequence. *J Mol Biol* 248:581-95.
- 562 26. Lyu Z, Jain R, Smith P, Fetchko T, Yan Y, Whitman WB. 2016. Engineering the  
563 Autotroph *Methanococcus maripaludis* for Geraniol Production. *ACS Synth Biol*  
564 doi:10.1021/acssynbio.5b00267.
- 565 27. Kim W, Whitman WB. 1999. Isolation of Acetate Auxotrophs of the Methane-Producing  
566 Archaeon *Methanococcus maripaludis* by Random Insertional Mutagenesis. *Genetics*  
567 152:1429-1437.

- 568 28. Gardner WL, Whitman WB. 1999. Expression vectors for *Methanococcus maripaludis*:  
569 overexpression of acetohydroxyacid synthase and beta-galactosidase. *Genetics* 152:1439-  
570 47.
- 571 29. Fischer F, Poetsch A. 2006. Protein cleavage strategies for an improved analysis of the  
572 membrane proteome. *Proteome Sci* 4:2.
- 573 30. Lawless C, Hubbard SJ. 2012. Prediction of missed proteolytic cleavages for the  
574 selection of surrogate peptides for quantitative proteomics. *OMICS* 16:449-56.
- 575 31. Lupa B, Hendrickson EL, Leigh JA, Whitman WB. 2008. Formate-dependent H<sub>2</sub>  
576 production by the mesophilic methanogen *Methanococcus maripaludis*. *Appl Environ*  
577 *Microbiol* 74:6584-90.
- 578 32. Bedford MT, Clarke SG. 2009. Protein arginine methylation in mammals: who, what, and  
579 why. *Mol Cell* 33:1-13.
- 580 33. Sarmiento F, Mrazek J, Whitman WB. 2013. Genome-scale analysis of gene function in  
581 the hydrogenotrophic methanogenic archaeon *Methanococcus maripaludis*. *Proc Natl*  
582 *Acad Sci U S A* 110:4726-31.
- 583 34. Ciryam P, Morimoto RI, Vendruscolo M, Dobson CM, O'Brien EP. 2013. In vivo  
584 translation rates can substantially delay the cotranslational folding of the *Escherichia coli*  
585 cytosolic proteome. *Proc Natl Acad Sci U S A* 110:E132-40.
- 586 35. Gingold H, Pilpel Y. 2011. Determinants of translation efficiency and accuracy. *Mol Syst*  
587 *Biol* 7:481.
- 588 36. Kusevic D, Kudithipudi S, Jeltsch A. 2016. Substrate Specificity of the HEMK2 Protein  
589 Glutamine Methyltransferase and Identification of Novel Substrates. *J Biol Chem*  
590 291:6124-6133.

- 591 37. Paik WK, Paik DC, Kim S. 2007. Historical review: the field of protein methylation.  
592 Trends in Biochemical Sciences 32:146-152.
- 593 38. Major TA, Liu Y, Whitman WB. 2010. Characterization of energy-conserving  
594 hydrogenase B in *Methanococcus maripaludis*. J Bacteriol 192:4022-30.
- 595 39. Lie TJ, Costa KC, Lupa B, Korpole S, Whitman WB, Leigh JA. 2012. Essential  
596 anaplerotic role for the energy-converting hydrogenase Eha in hydrogenotrophic  
597 methanogenesis. Proc Natl Acad Sci USA 109:15473-8.
- 598 40. Long F, Wang L, Lupa B, Whitman WB. 2017. A flexible system for cultivation of  
599 *Methanococcus* and other formate-utilizing methanogens. Archaea (In press).
- 600 41. Jones WJ, Paynter MJB, Gupta R. 1983. Characterization of *Methanococcus maripaludis*  
601 sp. nov., a new methanogen isolated from salt marsh sediment. Archives of Microbiology  
602 135:91-97.
- 603 42. Syka JE, Coon JJ, Schroeder MJ, Shabanowitz J, Hunt DF. 2004. Peptide and protein  
604 sequence analysis by electron transfer dissociation mass spectrometry. Proc Natl Acad  
605 Sci U S A 101:9528-33.
- 606 43. Franklin MJ, Wiebe WJ, Whitman WB. 1988. Populations of methanogenic bacteria in a  
607 georgia salt marsh. Appl Environ Microbiol 54:1151-7.
- 608 44. Schindelin J, Rueden CT, Hiner MC, Eliceiri KW. 2015. The ImageJ ecosystem: An open  
609 platform for biomedical image analysis. Mol Reprod Dev 82:518-29.
- 610 45. Markowitz VM, Chen I-MA, Chu K, Szeto E, Palaniappan K, Pillay M, Ratner A, Huang  
611 J, Pagani I, Tringe S, Huntemann M, Billis K, Varghese N, Tennessen K, Mavromatis K,  
612 Pati A, Ivanova NN, Kyrpides NC. 2014. IMG/M 4 version of the integrated metagenome  
613 comparative analysis system. Nucleic Acids Res 42:D568-D573.

- 614 46. Markowitz VM, Chen I-MA, Palaniappan K, Chu K, Szeto E, Pillay M, Ratner A, Huang  
615 J, Woyke T, Huntemann M, Anderson I, Billis K, Varghese N, Mavromatis K, Pati A,  
616 Ivanova NN, Kyrpides NC. 2014. IMG 4 version of the integrated microbial genomes  
617 comparative analysis system. *Nucleic Acids Res* 42:D560-D567.
- 618 47. Naville M, Ghuillot-Gaudeffroy A, Marchais A, Gautheret D. 2011. ARNold: a web tool  
619 for the prediction of Rho-independent transcription terminators. *RNA biology* 8:11-3.
- 620 48. Rice P, Longden I, Bleasby A. 2000. EMBOSS: the European Molecular Biology Open  
621 Software Suite. *Trends Genet* 16:276-7.
- 622 49. Moreland JL, Gramada A, Buzko OV, Zhang Q, Bourne PE. 2005. The Molecular  
623 Biology Toolkit (MBT): a modular platform for developing molecular visualization  
624 applications. *BMC Bioinformatics* 6:21.
- 625 50. Kears e M, Moir R, Wilson A, Stones-Havas S, Cheung M, Sturrock S, Buxton S, Cooper  
626 A, Markowitz S, Duran C, Thierer T, Ashton B, Meintjes P, Drummond A. 2012.  
627 Geneious Basic: an integrated and extendable desktop software platform for the  
628 organization and analysis of sequence data. *Bioinformatics* 28:1647-9.
- 629 51. Mayumi D, Mochimaru H, Tamaki H, Yamamoto K, Yoshioka H, Suzuki Y, Kamagata  
630 Y, Sakata S. 2016. Methane production from coal by a single methanogen. *Science*  
631 354:222-225.

632

633

634 **Table 1.** Distribution of the methanogenesis marker protein 10 (Mmp10) homologs within the Archaea

| Lineages                              | No. of genomes | No. of genomes encoding Mmp10 | No. of genomes with <i>mmp10</i> flanking <i>mcr</i> <sup>a</sup> |
|---------------------------------------|----------------|-------------------------------|-------------------------------------------------------------------|
| <i>Methanococcales</i>                | 19             | 19                            | 19                                                                |
| <i>Methanopyrales</i>                 | 1              | 1                             | 1                                                                 |
| <i>Methanobacteriales</i>             | 58             | 58                            | 53 <sup>b</sup>                                                   |
| <i>Methanomicrobiales</i>             | 20             | 19 <sup>c</sup>               | 0                                                                 |
| <i>Methanocellales</i>                | 3              | 3                             | 0                                                                 |
| <i>Methanosarcinales</i>              | 112            | 109 <sup>d</sup>              | 98 <sup>e</sup>                                                   |
| <i>Methanomassiliicoccales</i>        | 8              | 0                             | 0                                                                 |
| Non-methanogenic <i>Euryarchaeota</i> | 275            | 0                             | 0                                                                 |
| Unclassified <i>Euryarchaeota</i>     | 75             | 2 <sup>f</sup>                | 0                                                                 |
| <i>Bathyarchaeota</i>                 | 24             | 0                             | 0                                                                 |
| <i>Verstraetearchaeota</i>            | 5              | 0                             | 0                                                                 |
| Other Archaea                         | 359            | 0                             | 0                                                                 |

635 <sup>a</sup>Marker 10 position was examined by "Show neighborhood regions with the same top COG hit (via  
636 top homolog)" command at IMG/M ER.

637 <sup>b</sup>Not linked to *mcr* in *Methanobrevibacter smithii* TS145B and ACE6, *Methanobrevibacter*  
638 *curvatus* DSM11111, and *Methanobacterium* sp. Maddingley. These are all draft genomes where  
639 *mmp10* and *mcr* are on different contigs; in *Methanosphaera stadtmanae*, *mmp10* flanks the *mcrC*-  
640 *mtr* operon with *mrtBDGA* 16.8kb downstream of the *mcr* operon.

641 <sup>c</sup>Absent in *Methanoculleus bourgensis* BA1.

642 <sup>d</sup>Absent in *Methanosarcina horonobensis* JCM 15518 (draft genome), *Methanosarcina mazei*  
643 Tuc01; and ANME-1 (FP565147); present in all five ANME-2 genomes.

644 <sup>e</sup>Not linked in four of the five ANME-2 genomes, all three *Methanosaeta* genomes,  
645 *Methanosarcina mazei* 1.H.A.2.8 (draft genome with *mmp10* and *mcr* on separate contigs),  
646 *Methanosalsum zhilinae*, *Methanoflorens stordalenmirensis*, and *Methermicoccus shengliensis*.

647 <sup>f</sup>Present in *Euryarchaeota* archaeon JGI 0000059-G05 and *Euryarchaeota* sp. AmaM. Both *rRNA*  
648 and *mcrA*, the conventional gene markers, were absent in the first archaeon. However, it encoded an  
649 McrC subunit which had 85% of amino acid identity to that from *Methanosaeta concilli*. The  
650 second archaeon has been recently named *Methermicoccus shengliensis* strain AmaM (51).  
651 Therefore, both archaeal species are in fact methanogens.

652

653 **Table 2.** Abundance of peptides containing methyl-R<sup>275</sup> after pepsin digestion

| <i>mmp10</i> genotype        | -RR % <sup>a</sup> | -Rr % <sup>b</sup> | MS/MS spectra |
|------------------------------|--------------------|--------------------|---------------|
| $\Delta mmp10$               | 100                | ND <sup>c</sup>    | Fig. S7       |
| wild-type <sup>d</sup>       | 4                  | 96                 | Fig. S8       |
| $\Delta mmp10 + Pnat-mmp10$  | 2                  | 98                 | Fig. S9       |
| $\Delta mmp10 + PhmvA-mmp10$ | 2                  | 98                 | Fig. S10      |

654 <sup>a</sup>Peptides where neither R<sup>274</sup> nor R<sup>275</sup> were methylated.

655 <sup>b</sup>Peptides where R<sup>275</sup> was methylated. r indicates 5-methyl-R.

656 <sup>c</sup>ND., not detected.

657 <sup>d</sup>Mcr was the recombinant his-tagged enzyme expressed in S0001.

658



659 **Table 3.** Plasmids and Microbial Strains

| Names    | Descriptions                                                                                     | References |
|----------|--------------------------------------------------------------------------------------------------|------------|
| Plasmids |                                                                                                  |            |
| p5L-R    | Template vector for PCR amplification of the RMR module                                          | This study |
| Mm10     | Linear plasmid made by flanking RMR with 1554U and 1554D                                         | This study |
| pMEV4    | Expression vector for the <i>M. maripaludis</i> S0001 chassis                                    | (26)       |
| p4MK10   | <i>mmp10</i> cloned into pMEV4                                                                   | This study |
| pMEV4m   | Synthetic mCherry reporter cloned into pMEV4                                                     | This study |
| pM10m    | pMEV4m modification by replacing PhmvA promoter with native promoter for <i>mmp10</i>            | This study |
| pM10     | pM10m modification by replacing mCherry gene with <i>mmp10</i>                                   | This study |
| Strains  |                                                                                                  |            |
| S0001    | Expression host containing ORF1 from pURB500 integrated into the <i>M. maripaludis</i> S2 genome | (22)       |
| S0030    | $\Delta$ <i>mmp10</i> mutant in the S0001 background                                             | This study |
| S0031    | Recombinant S0030 hosting the pM10 vector                                                        | This study |
| S0032    | Recombinant S0001 hosting the pM10m vector                                                       | This study |
| S0033    | Recombinant S0001 hosting the pMEV4m vector                                                      | This study |
| S0034    | Recombinant S0030 hosting the p4MK10 vector                                                      | This study |
| S0035    | Recombinant S0001 hosting the pM10 vector                                                        | This study |
| S0036    | Recombinant S0001 hosting the p4MK10 vector                                                      | This study |
| S0037    | Recombinant S0001 hosting the pMcrS1 vector                                                      | This study |

660

661 **Figures legends**

662 **Fig. 1. Structural features of Mmp10 and its potential target sequence in McrA.** (A) In *M.*  
663 *maripaludis*, Mmp10 is encoded by MMP1554, which is transcribed divergently from the  
664 adjacent *mcrBCDGA* operon that encodes the methyl-coenzyme M reductase (14). The intergenic  
665 sequence between *mmp10* and *mcr* is only 259 bp in length. Therefore, *Pmcr*, the ~290 bp long  
666 promoter that drives *mcr* expression (11), extends partially into the coding region of *mmp10*. The  
667 exact promoter sequence for *mmp10* is unknown, but B recognition element (BRE) and TATA  
668 box sequences could be predicted from within the intergenic sequence. Thus, the whole  
669 intergenic sequence is taken as the predicted *mmp10* native promoter namely *Pnat* in this study.

670 (B) Structural features predicted for the Mmp10 protein. SAM-dependent methyltransferases  
671 have a highly conserved GxG motif in the first  $\beta$ -sheet and an acidic residue (D or E) in the  
672 second  $\beta$ -sheet. While  $\beta$ -sheets are difficult to predict without a crystal structure,  $\beta$ -strands and  
673 turns that form  $\beta$ -sheets can be more easily identified. Two GxG motifs (brown boxes) were  
674 found. The one positioned at 144~146 was in a region likely to form a  $\beta$ -sheet and conserved in  
675 all homologs from six genomes representing each methanogen order and one ANME-2 genome  
676 (Fig. S1). Both upstream and downstream of the conserved GxG motif, multiple conserved  
677 acidic residues (yellow boxes) could be also identified. At least three of them could be located in  
678 a  $\beta$ -sheet, at positions 20, 82 and 163. Both positions 82 and 163 were conserved among the  
679 homologs, except that the position 163 of *Methanopyrus kandleri* was a nucleophilic S residue  
680 instead of the conserved acidic E residue (Fig. S1). The legend for each structural feature is  
681 shown at the bottom of the figure. (C) Sequence logo of the context of Met-Arg from an  
682 alignment of 251 McrA amino acid sequences from all seven orders of methanogens available on

683 the IMG at the time of analysis. On top of the logo, sequence consensus and coordinates are  
684 shown, and Met-Arg is located at position 300 in this alignment.

685 **Fig. 2 Methanococcal Mcr active site as illustrated by the crystal structure of**  
686 *Methanothermococcus thermolithotrophicus* (5N1Q) (19). (A) View from the surface of Mcr.  
687 Shown in gray ball-and-stick model, the coenzymes F<sub>430</sub>, M (HS-CoM), and B (HS-CoB) are  
688 embedded within the active site pocket created primarily by the McrA and McrA' subunits. (B)  
689 A see-through view shows the PAR<sup>274</sup>R<sup>275</sup>SRG motif (shown in green ball-and-stick model) of  
690 McrA contributing to the formation of the active site pocket. The post-translational modified  
691 (PTM) methyl group is indicated for R<sup>275</sup>, which is located far away from the HS-CoB, e.g., the  
692 distance between the carbon atom of this PTM and the negatively charged oxygen atoms of the  
693 carboxyl group on the HS-CoB is 6.7 Å. In contrast, its neighboring R<sup>274</sup> is much closer to the  
694 HS-CoB, suggesting potential interactions. The positively charged nitrogen atom of the amine  
695 group of R<sup>274</sup> and the negatively charged oxygen atoms of the phosphate or carboxyl groups of  
696 the HS-CoB were within 3.3-3.8 Å of each other, as indicated by the dash lines.

697 **Fig. 3 Growth of the  $\Delta mmp10$  mutant and complementation strains.** *M. maripaludis* strains  
698 S0001 (the wild-type), S0030 (the deletion mutant), S0031 (the *Pnat* $\Delta mmp10$  complement), and  
699 S0034 (the *PhmvA*- $\Delta mmp10$  complement). Cultures were grown in 20 mL of complex formate  
700 broth without puromycin. Open symbols indicate when cells were sampled for assays of resting  
701 cells shown in Fig. 6. Error bars indicate standard deviations for 3 independent measurements. In  
702 many cases, the error bars were smaller than the symbols and are not shown.

703 **Fig. 4 Mcr expression in the  $\Delta mmp10$  mutant and complementation strains.** SDS PAGE  
704 profiles for strains: 01, S0001 (the wild-type); 30, S0030 (the deletion mutant); 34, S0034 (the  
705 *PhmvA*- $\Delta mmp10$  complement); and 31, S0031 (the *Pnat* $\Delta mmp10$  complement). M, a purified

706 wild-type his-tagged Mcr. L, protein ladder (NEB #P7712). Although only duplicate samples are  
707 shown here due to space, a third sample was also run on a different SDS gel that showed the  
708 identical pattern. Quantification of the Mmp10 was not possible because Mmp10 (48.9 kDa) and  
709 McrB (46.6 kDa) have nearly the same size and were not separated.

710 **Fig. 5. Growth of *M. maripaludis* strains with the complementation plasmids in a wild-type**  
711 **background. (A)** Growth of both S0035 (S0001 + *Pnat.mmp10*) and S0036 (S0001 + *PhmvA-*  
712 *mmp10*) were inhibited compared to S0001 (the wild-type) and S0030 (the deletion mutant). **(B)**  
713 Growth inhibition for both S0035 and S0036 were more severe than the corresponding  
714 complementation strains with the plasmids in the  $\Delta mmp10$  background; S0031 (S0030 + *Pnat.*  
715 *mmp10*) and S0034 (S0030 + *PhmvA-mmp10*). Cultures were grown in 5 mL of complex formate  
716 broth without puromycin in 28 mL Balch tubes. Error bars indicate standard deviations for 3  
717 independent measurements. In many cases, the error bars were smaller than the symbols and are  
718 not shown.

719 **Fig. 6. Cellular rate of methanogenesis in the  $\Delta mmp10$  mutant and complementation**  
720 **strains. (A)** Rates of CH<sub>4</sub> production during growth for the cultures shown in Fig. 3. The rates  
721 were calculated from the increases in CH<sub>4</sub> in the headspace of the cultures. The maximal rates  
722 were  $0.91 \pm 0.14$  (S0001),  $0.49 \pm 0.03$  (S0030),  $0.60 \pm 0.07$  (S0031), and  $0.84 \pm 0.06$  (S0034)  
723 U•mg<sup>-1</sup>. **(B)** Specific CH<sub>4</sub> production rates for resting cells sampled from cultures shown in the  
724 open symbols in Fig. 3. The maximal rates were  $1.44 \pm 0.23$  (S0001),  $0.61 \pm 0.06$  (S0030),  $0.70$   
725  $\pm 0.08$  (S0031), and  $1.55 \pm 0.20$  (S0034) U•mg<sup>-1</sup>. Error bars indicate standard deviations for 3  
726 independent measurements. U•mg<sup>-1</sup> indicates  $\mu\text{mol CH}_4 \text{ min}^{-1} \text{ mg}^{-1}$  dry weight.

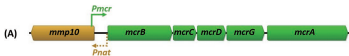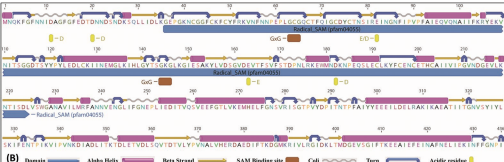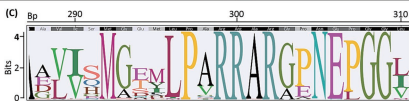

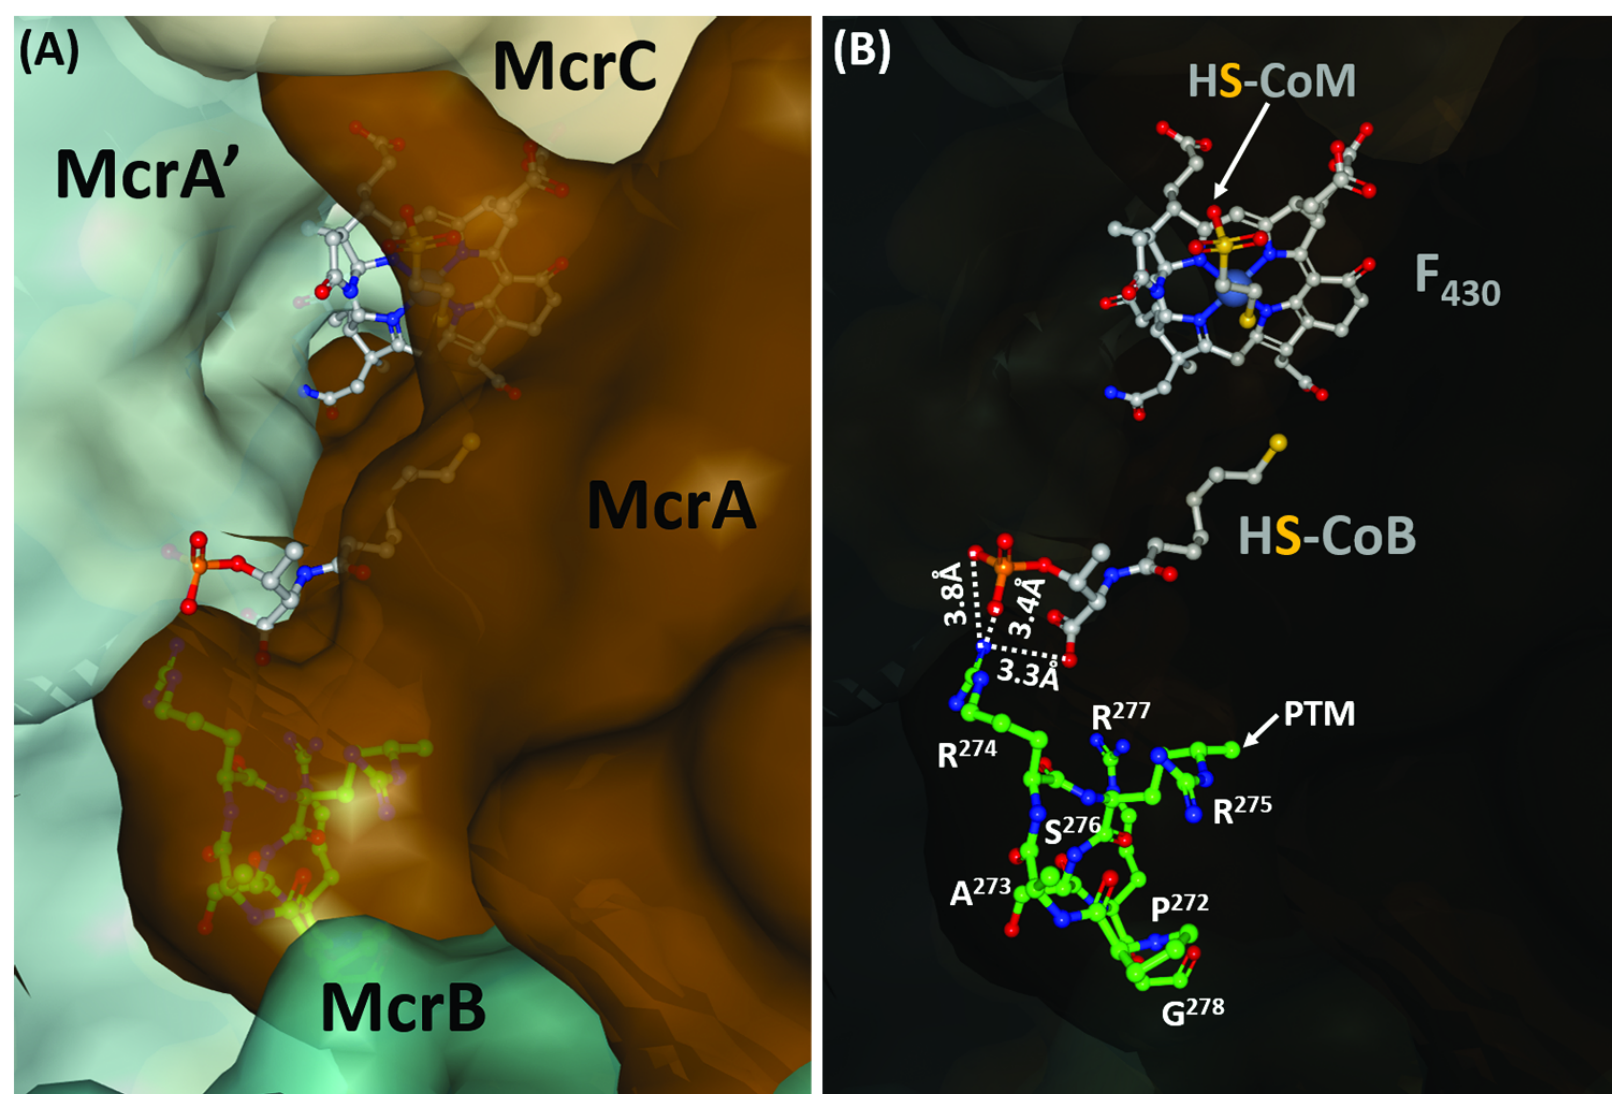

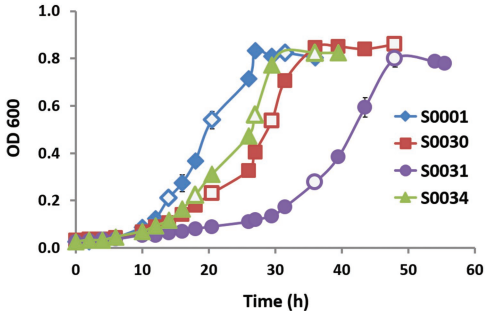

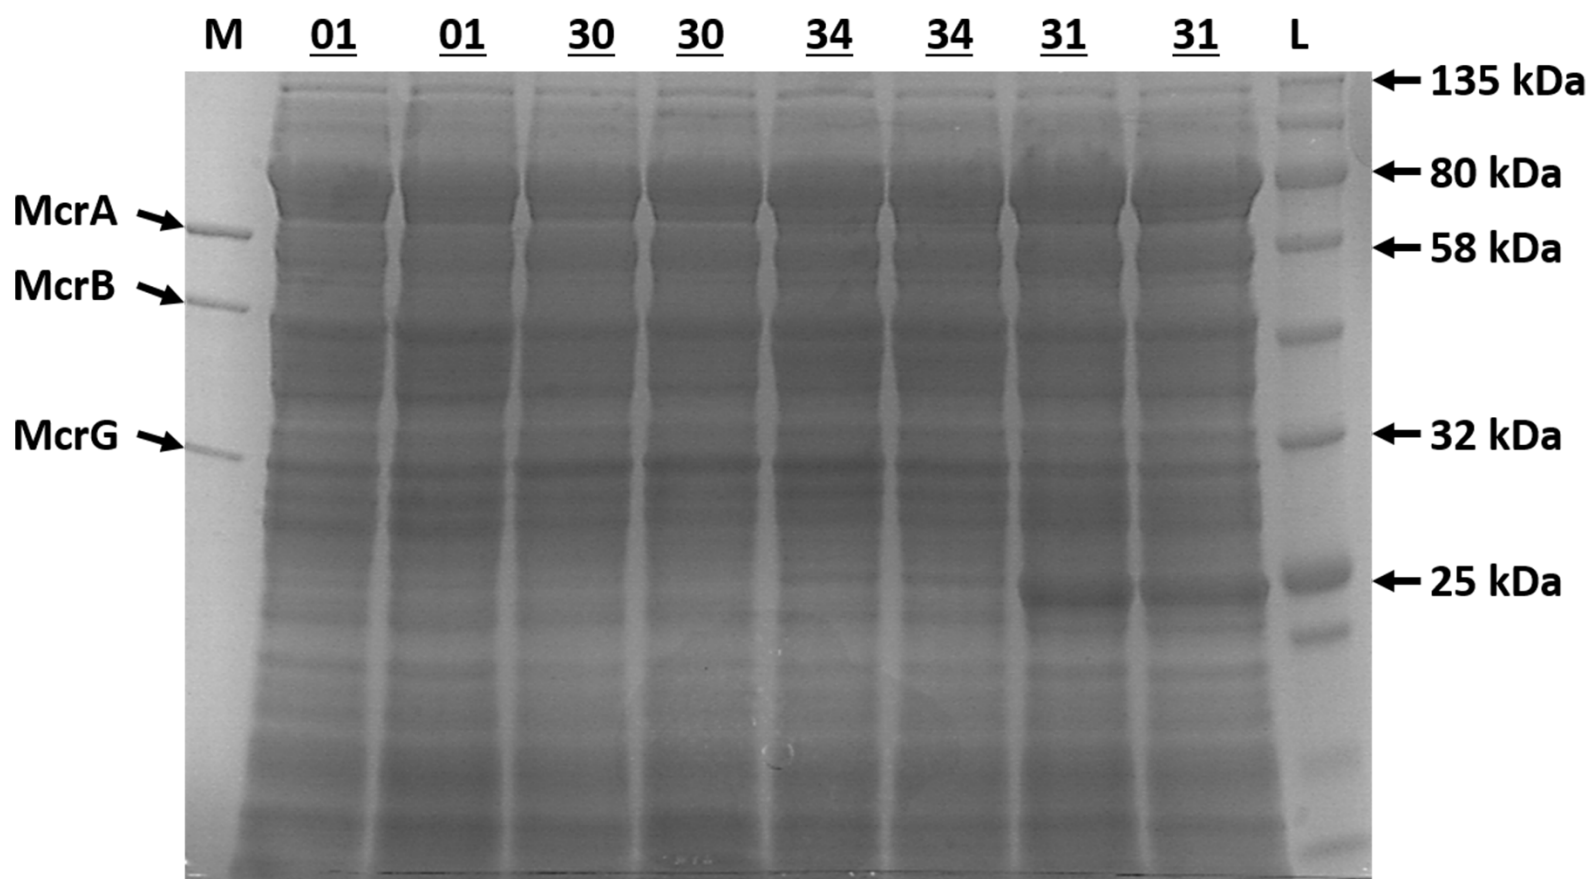



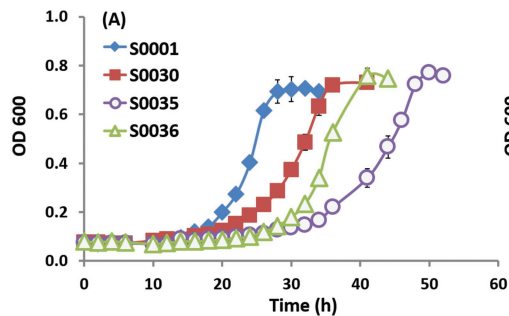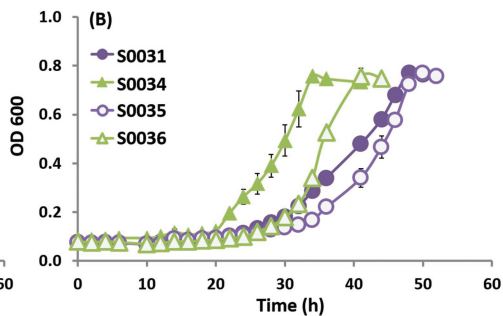

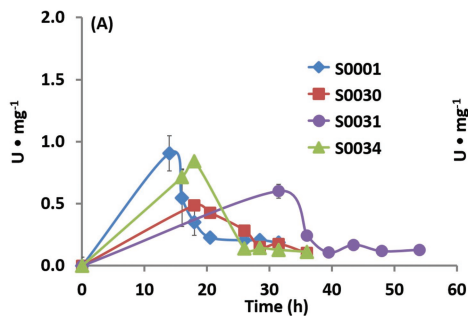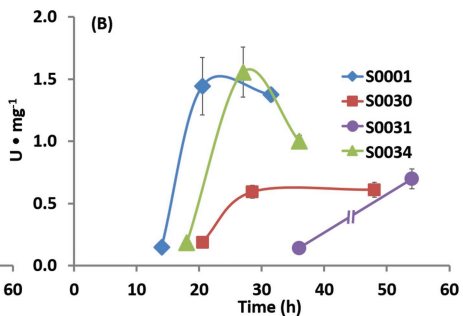

Source: https://www.biorxiv.org/content/10.1101/211441v1.full.pdf
